# Supplementary material for: Effect of Bacillus species–fermented products and essential oils on growth performance, gut morphology, cecal short-chain fatty acid levels, and microbiota community in broilers
Source: PubMed Central journal article supplement — Poult Sci. 2022 May 21;101(8):101970. doi: 10.1016/j.psj.2022.101970 (PMC9241036; doi:10.1016/j.psj.2022.101970), 2022-05-21
Supplement: mmc1.pdf [file mmc1.pdf]

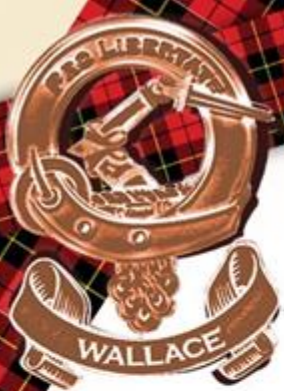

# Wallace Academic Editing

## English Editing Certificate

This certifies that the paper **Effect of Bacillus species–fermented products and essential oils on growth performance, gut morphology, cecal short-chain fatty acid levels, and microbiota community in broilers** has been edited by Sofia Gharaibeh on February 12, 2022 and is considered to be improved in grammar, punctuation, spelling, verb usage, sentence structure, conciseness, general readability, writing style, and native English usage to the best of the editor's ability.



*Sofia Gharaibeh*

Best regards,  
Wallace Academic Editing

Phone No.: +886-2-2555-5830

Website: <http://www.editing.tw>

Email: [editing@editing.tw](mailto:editing@editing.tw)

Address: 3F., No.180, Chang'an W. Rd., Datong Dist., Taipei City
